# Supplementary material for: Association of Mercury Exposure and Maternal Sociodemographics on Birth Outcomes of Indigenous and Tribal Women in Suriname
Source: MDPI journal article supplement (doi:10.3390/ijerph18126370), 2021-06-12
Supplement: s1 [file s1]

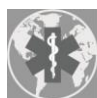

**Table S1.** Mercury levels and adverse birth outcome.

| Interior and Paramaribo |          |               |          |               |                 |
|-------------------------|----------|---------------|----------|---------------|-----------------|
| ABO                     | Yes      |               | No       |               |                 |
|                         | <i>n</i> | Median [IQR]  | <i>n</i> | Median [IQR]  | <i>p</i> -value |
| Hair Hg                 |          |               |          |               |                 |
| ABO                     | 69       | 1.7 [0.7–6.5] | 235      | 2.1 [1.0–5.8] | 0.460           |
| SB                      | 15       | 1.6 [0.7–2.8] | 289      | 2.1 [0.9–6.0] | 0.197           |
| PTB                     | 47       | 1.8 [0.7–6.8] | 250      | 2.1 [1.0–5.8] | 0.454           |
| LBW                     | 30       | 1.4 [0.7–3.1] | 263      | 2.2 [1.0–6.2] | 0.085           |
| LAS                     | 20       | 1.4 [0.6–2.4] | 284      | 2.1 [0.9–6.2] | 0.036           |

**Table S2.** Mercury levels and adverse birth outcome for Interior population.

| Interior        |          |               |          |               |                 |
|-----------------|----------|---------------|----------|---------------|-----------------|
| ABO             | Yes      |               | No       |               |                 |
|                 | <i>n</i> | Median [IQR]  | <i>n</i> | Median [IQR]  | <i>p</i> -value |
| Hair Hg         |          |               |          |               |                 |
| ABO             | 41       | 4.4 [1.8–9.2] | 144      | 3.5 [2.1–8.6] | 0.802           |
| Stillbirth      | 6        | 3.3 [1.5–5.6] | 179      | 3.6 [2.1–8.8] | 0.448           |
| PTB             | 27       | 6.5 [2.1–9.2] | 156      | 3.5 [2.1–8.8] | 0.532           |
| LBW             | 18       | 2.2 [1.4–7.9] | 164      | 3.7 [2.1–8.8] | 0.096           |
| Low Apgar Score | 7        | 2.8 [0.9–4.4] | 178      | 3.6 [2.1–8.9] | 0.174           |

**Table S3.** Adjusted Odds ratio (OR) with 95% Confidence Intervals (95% CI) for adverse birth outcomes and for preterm birth without ethnicity.

| Adverse Birth Outcomes (yes vs. no)     |                 |          |        |       | Outcome Preterm Birth (yes vs. no)      |                 |          |        |       |
|-----------------------------------------|-----------------|----------|--------|-------|-----------------------------------------|-----------------|----------|--------|-------|
| Adjusted model                          | <i>p</i> -value | Crude OR | 95% CI |       | Adjusted model                          | <i>p</i> -value | Crude OR | 95% CI |       |
|                                         |                 |          | LB     | UB    |                                         |                 |          | LB     | UB    |
| Paramaribo vs. Interior                 | 0.577           | 0.777    | 0.32   | 1.885 | Paramaribo vs. Interior                 | 0.924           | 1.051    | 0.379  | 2.912 |
| Age in years                            | 0.442           | 0.982    | 0.939  | 1.028 | Age in years                            | 0.004           | 0.919    | 0.868  | 0.973 |
| Parity no vs. 1+ previous live births   | 0.279           | 1.482    | 0.727  | 3.023 | Parity no vs. 1+ previous live births   | 0.275           | 0.618    | 0.261  | 1.466 |
| Education primary or not vs. else       | 0.509           | 0.754    | 0.326  | 1.744 | Education primary or not vs. else       | 0.659           | 0.803    | 0.304  | 2.126 |
| Household income <1500 vs. else         | 0.667           | 0.837    | 0.373  | 1.881 | Household income <1500 vs. else         | 0.342           | 0.63     | 0.243  | 1.633 |
| First antenatal visit <12 vs. 12+ weeks | 0.34            | 0.721    | 0.367  | 1.413 | First antenatal visit <12 vs. 12+ weeks | 0.337           | 0.685    | 0.316  | 1.482 |
| Hg exposure                             | 0.846           | 0.992    | 0.916  | 1.075 | Hg exposure                             | 0.74            | 1.015    | 0.928  | 1.11  |

**Table S4.** Characteristics of the study population by geographic region.

| Variables               | Paramaribo              |       |                    |       |                 | Interior                |       |           |       |                  |
|-------------------------|-------------------------|-------|--------------------|-------|-----------------|-------------------------|-------|-----------|-------|------------------|
|                         | Indigenous ( <i>n</i> ) | %     | Tribal( <i>n</i> ) | %     | <i>p</i> -value | Indigenous ( <i>n</i> ) | %     | Tribal(N) | %     | <i>p</i> -value  |
| ABO                     | 5                       | 33.30 | 31                 | 22.30 | 0.338           | 29                      | 29.30 | 16        | 16.30 | <b>0.030</b>     |
| Stillbirth              | 2                       | 13.30 | 11                 | 7.90  | 0.473           | 2                       | 2.00  | 4         | 4.10  | 0.400            |
| PTB                     | 2                       | 14.30 | 19                 | 14.60 | 0.974           | 22                      | 22.20 | 9         | 9.40  | <b>0.014</b>     |
| LBW                     | 3                       | 21.40 | 12                 | 9.40  | 0.164           | 8                       | 8.20  | 10        | 10.40 | 0.589            |
| Low Apgar score         | 2                       | 14.30 | 6                  | 4.70  | 0.139           | 2                       | 2.00  | 5         | 5.10  | 0.243            |
| Hg exposure             |                         |       |                    |       |                 |                         |       |           |       |                  |
| lowmedium               | 8                       | 88.90 | 108                | 98.20 | 0.087           | 16                      | 16.70 | 71        | 79.80 | <b>&lt;0.001</b> |
| high                    | 1                       | 11.10 | 2                  | 1.80  |                 | 80                      | 83.30 | 18        | 20.20 |                  |
| Age                     |                         |       |                    |       |                 |                         |       |           |       |                  |
| 16-19                   | 2                       | 13.30 | 16                 | 11.50 | 0.863           | 29                      | 29.30 | 16        | 16.30 | <b>0.025</b>     |
| 20-34                   | 9                       | 60.00 | 93                 | 66.90 |                 | 61                      | 61.60 | 63        | 64.30 |                  |
| 35+                     | 4                       | 26.70 | 30                 | 21.60 |                 | 9                       | 9.10  | 19        | 19.40 |                  |
| Parity                  |                         |       |                    |       |                 |                         |       |           |       |                  |
| no previous live births | 5                       | 33.30 | 37                 | 26.60 | 0.579           | 25                      | 25.30 | 14        | 14.60 | 0.063            |
| 1+ previous live births | 10                      | 66.70 | 102                | 73.40 |                 | 74                      | 74.70 | 82        | 85.40 |                  |
| Educational level       |                         |       |                    |       |                 |                         |       |           |       |                  |
| primary or not          | 4                       | 26.70 | 28                 | 20.10 | 0.554           | 86                      | 87.80 | 78        | 82.10 | 0.272            |
| secondary and up        | 11                      | 73.30 | 111                | 79.90 |                 | 12                      | 12.20 | 17        | 17.90 |                  |

Household  
income in SRD

|       |    |       |    |       |       |    |       |    |       |       |
|-------|----|-------|----|-------|-------|----|-------|----|-------|-------|
| <1500 | 3  | 21.40 | 43 | 33.30 | 0.365 | 91 | 92.90 | 74 | 84.10 | 0.059 |
| 1500+ | 11 | 78.60 | 86 | 66.70 |       | 7  | 7.10  | 14 | 15.90 |       |

Timing of first  
antenatal visit

|           |    |       |    |       |       |    |       |    |       |       |
|-----------|----|-------|----|-------|-------|----|-------|----|-------|-------|
| <12 weeks | 11 | 73.30 | 87 | 65.40 | 0.539 | 23 | 24.00 | 12 | 13.20 | 0.059 |
| 12+ weeks | 4  | 26.70 | 46 | 34.60 |       | 73 | 76.00 | 79 | 86.80 |       |
